# Supplementary material for: Geriatric syndromes, multimorbidity, and life satisfaction among older adults in India: a cross-sectional analysis of the Longitudinal Ageing Study in India (LASI)
Source: Research Square preprint supplement (doi:10.21203/rs.3.rs-9722448/v1), 2026-05-29
Supplement: Supplementary file 1 [file a48ccd742ec615d1b30b4736.docx]

**Additional file 1**

**STROBE Statement — Checklist of items that should be included in reports of
cross-sectional studies**

*Manuscript: Geriatric syndromes, multimorbidity, and life satisfaction among older adults in India: a cross-sectional analysis of the Longitudinal Ageing Study in India (LASI)*

| **Section/Topic** | **Item No** | **Recommendation** | **Reported in our manuscript** | **Location** |
| --- | --- | --- | --- | --- |
| **Title and abstract** | 1(a) | Indicate the study's design with a commonly used term in the title or the abstract. | Addressed. The title contains 'a cross-sectional analysis of the Longitudinal Ageing Study in India (LASI)'. | Title page |
|  | 1(b) | Provide in the abstract an informative and balanced summary of what was done and what was found. | Addressed. Structured abstract (Background / Methods / Results / Conclusions) of ~340 words. | Abstract |
| **Introduction** | 2 | Explain the scientific background and rationale for the investigation being reported. | Addressed. Background section establishes the demographic transition in India, the MM and GS frameworks, the policy context (NPHCE, Ayushman Bharat), and the evidence gap on joint effects in nationally representative LMIC samples. | Background |
|  | 3 | State specific objectives, including any prespecified hypotheses. | Addressed. Three objectives stated explicitly in the final paragraph of Background: (i) prevalence/correlates of MM and GS; (ii) independent and joint associations with life satisfaction; (iii) GS dose-response. | Background, final paragraph |
| **Methods** | 4 | Present key elements of study design early in the paper. | Addressed. Methods opens with 'cross-sectional analysis of LASI Wave 1' and identifies the multistage stratified cluster sampling design. | Methods – Study design and data source |
|  | 5 | Describe the setting, locations, and relevant dates, including periods of recruitment, exposure, follow-up, and data collection. | Addressed. LASI Wave 1 conducted April 2017 to December 2018 across 35 Indian states and union territories; the present analysis is a secondary analysis of these data. | Methods – Study design and data source |
|  | 6 | Give the eligibility criteria, and the sources and methods of selection of participants. | Addressed. Sample restricted to participants aged ≥60 years from LASI Wave 1; multistage stratified area probability cluster sampling described. | Methods – Study design and data source; Methods – Study population |
|  | 7 | Clearly define all outcomes, exposures, predictors, potential confounders, and effect modifiers. Give diagnostic criteria, if applicable. | Addressed. Outcome (SWLS) operationalised in 'Outcome: life satisfaction'. Exposures (MM, 7 GS components) operationalised in 'Exposure 1' and 'Exposure 2'. Covariates listed in 'Covariates'. Diagnostic thresholds specified for cognition (10th weighted percentile of FGCP), depression (CES-D 10 ≥4), and underweight (BMI <18.5). | Methods – Variables |
|  | 8 | For each variable of interest, give sources of data and details of methods of assessment (measurement). Describe comparability of assessment methods if there is more than one group. | Addressed. Outcome and exposure measurement instruments and source variables (Harmonized LASI variable names) described in Variables subsection. Use of CES-D 10 (vs CIDI-SF) justified in a dedicated paragraph. | Methods – Variables |
|  | 9 | Describe any efforts to address potential sources of bias. | Addressed. Application of LASI individual analysis weights and sandwich-estimator standard errors addresses design-induced bias; pre-specified sensitivity analysis excluding depression from the GS composite addresses construct-overlap bias. | Methods – Statistical analysis |
|  | 10 | Explain how the study size was arrived at. | Addressed. Sample size determined by the LASI Wave 1 enrolment (n=73,408) restricted to ≥60 years (n=31,915) and complete cases (n=30,811). No a priori sample-size calculation was required as this is a secondary analysis of a population-representative survey. | Methods – Study population; Results – Sample characteristics; Figure 1 |
|  | 11 | Explain how quantitative variables were handled in the analyses. If applicable, describe which groupings were chosen and why. | Addressed. Life satisfaction analysed as continuous (regression) and categorical (Low/Medium/High per LASI India Report). Age grouped as 60–69, 70–79, ≥80. GS modelled as binary, count (0/1/2/≥3), and individual components. Wealth quintiles defined on weighted per-capita consumption. | Methods – Variables; Methods – Statistical analysis |
|  | 12(a) | Describe all statistical methods, including those used to control for confounding. | Addressed. Sequentially adjusted weighted ordinary least-squares linear regression with sandwich-estimator standard errors (4 models specified). | Methods – Statistical analysis |
|  | 12(b) | Describe any methods used to examine subgroups and interactions. | Addressed. MM × GS interaction term included in Models II and IV. | Methods – Statistical analysis |
|  | 12(c) | Explain how missing data were addressed. | Addressed. Complete-case analysis; per-variable missingness reported. Sample reduced from n=31,915 (≥60 years) to n=30,811 after exclusions. | Methods – Study population; Figure 1 |
|  | 12(d) | If applicable, describe analytical methods taking account of sampling strategy. | Addressed. LASI individual analysis weights (r1wtresp, post-stratified to the 2011 Census of India age-sex-state distribution) applied to all descriptive and regression estimates. Sandwich-estimator standard errors account for design-induced heteroskedasticity. | Methods – Statistical analysis |
|  | 12(e) | Describe any sensitivity analyses. | Addressed. Pre-specified sensitivity analysis re-fitting Model IV with depression excluded from the GS composite. Dose-response analysis by GS count (0/1/2/≥3) as a secondary analysis. | Methods – Statistical analysis |
| **Results** | 13(a) | Report numbers of individuals at each stage of study—eg numbers potentially eligible, examined for eligibility, confirmed eligible, included in the study, completing follow-up, and analysed. | Addressed. LASI Wave 1 N=73,408 → ≥60 years n=31,915 → complete case n=30,811. | Figure 1 (STROBE flow diagram); Results – Sample characteristics |
|  | 13(b) | Give reasons for non-participation at each stage. | Addressed. Exclusions reported: 41,493 aged 45–59 years; 1,104 with missing data (1,097 missing SWLS; 86 missing MM; 2 missing wealth — non-mutually-exclusive). | Figure 1; Results – Sample characteristics |
|  | 13(c) | Consider use of a flow diagram. | Addressed. STROBE flow diagram included as Fig. 1. | Figure 1 |
|  | 14(a) | Give characteristics of study participants (eg demographic, clinical, social) and information on exposures and potential confounders. | Addressed. Table 1 provides weighted sociodemographic characteristics with MM prevalence; Table 2 with GS prevalence. | Tables 1 and 2; Results – Sample characteristics; Results – Prevalence and determinants of multimorbidity / geriatric syndromes |
|  | 14(b) | Indicate number of participants with missing data for each variable of interest. | Addressed. Per-variable missing counts (life satisfaction n=1,097; MM n=86; wealth quintile n=2) reported in Methods – Study population and Figure 1 footnote. | Methods – Study population; Figure 1 |
|  | 15 | Report numbers of outcome events or summary measures. | Addressed. Weighted mean SWLS score (23.95, SD 7.23) reported; weighted prevalences of MM (23.4 %) and GS (70.5 %); category proportions in Table 4 and Figure 4a. | Results – Sample characteristics; Results – Prevalence sections; Tables 1–4 |
|  | 16(a) | Give unadjusted estimates and, if applicable, confounder-adjusted estimates and their precision (eg, 95% confidence interval). Make clear which confounders were adjusted for and why they were included. | Addressed. Table 5 presents bivariate (Model I), partially adjusted (Models II–III), and fully adjusted (Model IV) β coefficients with 95% CIs. Confounders listed in 'Covariates' and rationale (prior LASI literature) provided. | Table 5; Figure 2; Results – Multivariable regression analyses |
|  | 16(b) | Report category boundaries when continuous variables were categorised. | Addressed. SWLS categories (5–20 Low, 21–25 Medium, 26–35 High), age groups (60–69, 70–79, ≥80), and wealth quintiles defined in Variables and Statistical analysis. | Methods – Variables; Methods – Statistical analysis; Table 4 |
|  | 16(c) | If relevant, consider translating estimates of relative risk into absolute risk for a meaningful time period. | Not applicable — outcome is a continuous quality-of-life score (β coefficients), not relative risk. | — |
|  | 17 | Report other analyses done—eg analyses of subgroups and interactions, and sensitivity analyses. | Addressed. Dose-response by GS count (1/2/≥3 vs 0) reported in main text with β coefficients and 95% CIs. Sensitivity analysis excluding depression from the GS composite reported with β = −1.48 (95% CI −1.72 to −1.23). | Results – Dose-response and sensitivity analyses; Figure 4b |
| **Discussion** | 18 | Summarise key results with reference to study objectives. | Addressed. 'Main findings' subsection summarises that GS (not MM) is the principal correlate of lower life satisfaction, with a clear dose-response. | Discussion – Main findings |
|  | 19 | Discuss limitations of the study, taking into account sources of potential bias or imprecision. Discuss both direction and magnitude of any potential bias. | Addressed. Seven specific limitations enumerated and their directional implications discussed (cross-sectional design, self-reported MM under-ascertainment, self-reported GS components, population-relative cognitive threshold, residual confounding, Sikkim caveat, lack of full Taylor-series design adjustment). | Discussion – Strengths and limitations |
|  | 20 | Give a cautious overall interpretation of results considering objectives, limitations, multiplicity of analyses, results from similar studies, and other relevant evidence. | Addressed. Cautious interpretation given throughout Discussion, including the 'MM as marker of diagnostic access' reframing; explicit acknowledgement that the previous 'super-additive MM × GS' hypothesis is not supported by the weighted analysis. | Discussion (all subsections) |
|  | 21 | Discuss the generalisability (external validity) of the study results. | Addressed. National representativeness via LASI weights discussed in Strengths; the Sikkim limitation and the diagnostic-detection interpretation also speak directly to external validity within India. | Discussion – Strengths and limitations; Discussion – MM and the diagnostic-detection paradox |
| **Other information** | 22 | Give the source of funding and the role of the funders for the present study and, if applicable, for the original study on which the present article is based. | Addressed. Present study received no specific funding. LASI Wave 1 funding (MoHFW, NIA, UNFPA India) acknowledged in Funding declaration. | Declarations – Funding |

*Note. An Explanation and Elaboration article discusses each checklist item and gives methodological background and published examples of transparent reporting. The STROBE checklist is best used in conjunction with this article (freely available on the websites of PLoS Medicine at http://www.plosmedicine.org/, Annals of Internal Medicine at http://www.annals.org/, and Epidemiology at http://www.epidem.com/). Information on the STROBE Initiative is available at www.strobe-statement.org.*
